# Supplementary material
Source: Springer Nature journal article supplement (https://www.springermedizin.de/resource/supplementary/12885_2011_2914_MOESM13_ESM.pdf/9462328)

**A****Subcutaneous tumors****Cell line****No. of cells****Mice with tumors<sup>a</sup>****Weeks post-injection<sup>b</sup>**

|                       |                 |     |       |
|-----------------------|-----------------|-----|-------|
| WM278                 | $5 \times 10^6$ | 1/5 | 12    |
| WM278-GFP (C2)        | $5 \times 10^6$ | 1/5 | 16    |
| WM278-N7 (low Nck2)   | $5 \times 10^6$ | 1/5 | 14    |
| WM278-N14 (high Nck2) | $5 \times 10^6$ | 2/5 | 13-16 |
| WM1617                | $5 \times 10^6$ | 5/5 | 2-7   |

**B**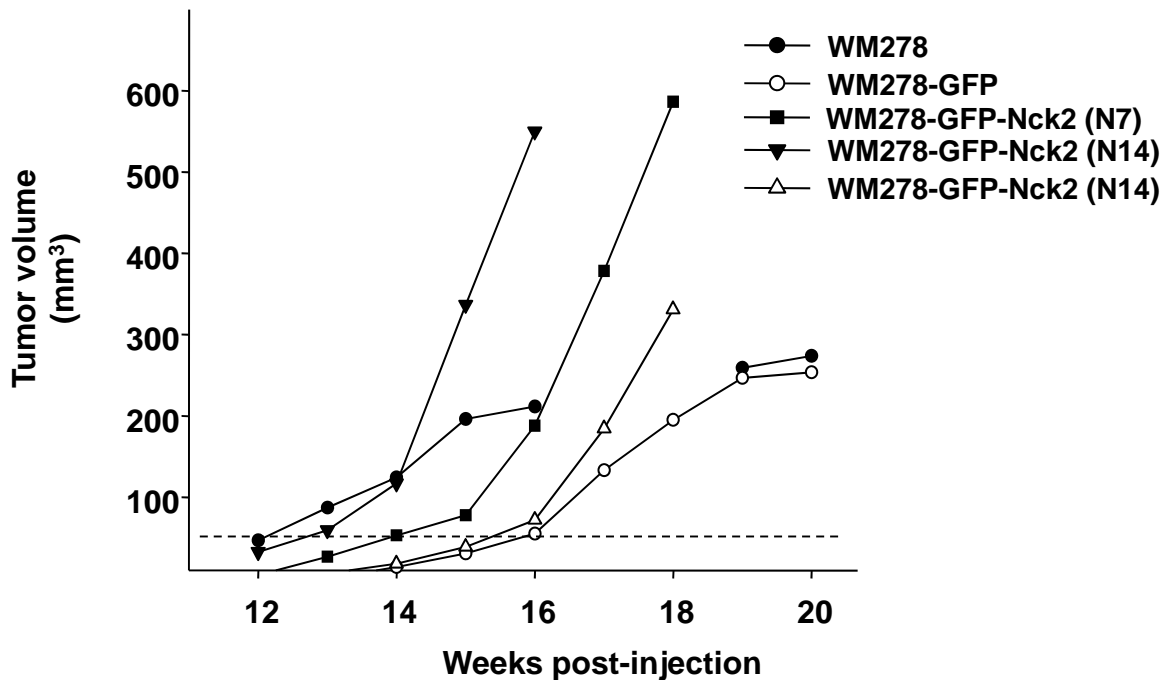

Supplement: MOESM13 [file 9462328]
